# Supplementary material
Source: PubMed Central journal article supplement (PMC2887068)
Supplement: mcq047_1.pdf [file mcq047_1.pdf]

## SUPPLEMENTARY DATA

Protein sequences and corresponding accession numbers that were used for the phylogenetic analyses.

>At-CAT1 (At4g21120)

MASGGGDDGLRRRGCSCTKDDFLPEESFQSMGNYLKALKETPSRFMDRIMTRSLDSDEINEMKARSGHEMKKTLT  
WDDLMMWFGIGAVIGSGIFVLTGLEARNHSGPAVVLSYVVSGVSAMLSVFCYTEFAVEIPVAGGSFAYLRVELGDF  
MAFIAAGNIILEYVVGGAAVARSWTSYFATLLNHKPEDFRIIVHKLGEDYSHLDPIAVGVCAICVLAUVGTKGS  
SRFNYIASIIHMOVILFVVIAGFTKADVKNYSDFTPYGVRGVFKSAAVLFFAYIGF'DAVSTMAEETKNPGRDIP  
GLVGSMVVTTVCYCLMAVTLCLMQPYQQIDPDAPFSVAFSAVGDWAKYIVAFGALKGMTTVLLVGAIGQARYMT  
HIARAHMPPWLAQVNAKTGTPINATVVMLAATALIAFFTCLKLILADLLSVSTLFIIFMFVAVALLVRRYYVTGET  
STRDRNKFLVFLGLILASSTATAVYWALEEEGWIGYCITVPIWFLSTVAMKFLVPQARAPKIWGVPLVPWLP  
SASIAINIFLLGSIDTKSFVRFAIWTGILLIYYVLFGLHATYDTAKATLKEKQALQKAEEGGVADNCSAT

>At-CAT2 (At1g58030)

MGFLVDTQKEGGHSGWYVRSRSLVRRKQVDSANGQSHGHQLARALTVPHLVAIGVGATIGAGVYILVGTVAREHSG  
PSLALSFLIAGIAAGLSAFICYAELSSRCPSAGSAYHYSYICVGEVAVIIGWALILEYTIIGSAVARGISP  
NLALIFGGEDGLPAILARHQIPGLDIVVDPCAAIVLVVVTGLLCMGIKESTFAQGIVTAVNVCVLLFVIVAGSYL  
GFKTGWPGYELPTGFFPFVGDGMFAGSATVFFAFIGFDSVASTAEVNRNPQRDLPIGIGLALLLCCSLYMMVS  
IVIVGLIPYYAMPDPTPISSAFASHMQWAVYLITLGAVMALCSALMGALLPQPRILMAMARDGLLPSIFSDIN  
KRTQVPVKATVATGLCAATLAFMDVSQLAGMVSVGTLLAFTMVAISVLILRYVPPDEQPLPSSLQERIDSVS  
FICGETTSSGHVGTSDSSHQPLIVNNDALVDVPLIKNQEALGCLVLSEETRIVAGWSIMFTCVGAFLLSYAAS  
SLSFPLIRYPLCGVGGCLLLAGLIALSSIDQDDARHTFGHSGGYMCPFVPLLPICILINMYLLVNLGSATWA  
RVSVWLLIGVIVYVYFGRKNSSLANAVYVTTAHAEEIYREHEGSLA

>At-CAT3 (At5g36940)

MGCLRSLVRRKQFDSSNGKAETHHHHQQLAKALTFPHLIAIGVGSTIGAGVYILVGTVAREHSGPALALSFLIAG  
ISAALSAFICYAELSSRFPSAGSAYHYSYICIGEGVAVIIGWALILEYTIIGGSTVARGISP  
NLAMIFGGEDCLPTILARHQIPGLDIVVDPCAAIVLVFIVTGLCCLGVKESTFAQGIVTTANVFMIFVIVAGSYL  
CFKGTGWVGYELPTGYFPYGVDMGTGSATVFFAYIGFDTVASMAEEVKNPRRDPLGIGIGISLLLCCLLYMMVS  
VVIVGLVPYYAMPDPTPISSAFSSHGIQWAAYLINLGAVMALCSALMGSILPQPRILMAMARDGLLPSYFSYV  
NQRTQVPINGTITTGVCAAILAFFMDVSQLAGMVSVGTTLVAFTMVAISLLIVRYVPPDEVPLPSSLQENSSSHV  
GTSIRSKQPLLGKVVDSVVDKENAPGWSVNLKKNRRKRFAGWSIMFTCIGNFLLSYAASSFLLPGLLRYSLCGV  
GGFLVGLIVLICIDQDDARHSFGHSGGFICPFVPLLPICILINMYLLVNLGAATWVRVSVWVFLGVVVYIFYG  
RRNSSLVNAVYVSTAHLQEI RRTSGHSLA

>At-CAT4 (At3g03720)

MNSLVRKQVDSVHLIKNDGPHQLAKKLSAVDLVAIGVGTIGAGVYILVGTVAREHTGPALAVSFFIAGVAAA  
L SACCYAELASRCPSAGSAYHYAICLGEIAWLVGWALVLDYTIIGSAIARGITPNLASFFGGDLNLPVFLARQT  
IPGVGIVVDPCAAALLIMIVTILLCFGIKESSTVQAIVTSVNVCTLVFIIIVGGYLACKTGWVGYDLPSGYFPFGL  
NGILAGSAVFFSYIGFDTVTSTAEVKNPQRDLPLGIGIALLICILYMLLSVVIVGLVPYYSLNPDPTPISSAF  
GDSGMQWAAAYILTTGAILTALCASLLGSLLAQPRIFMAMARDGLLPAFFSEISPRTQVPVKSTIAIGVLAALAF  
FMDVAQLSEMVSVGTLMFAFTAVAVCVLVLRYVPPDGVPLSSSSQTLSDTDESRAETENFLVDAIESSDSPLLGNET  
ARDEKYFGKRRKIAAWSIALVCIGVLGLASAASAERLPSFPRFTICGVSAVILLGSLITLGYIDEDERHNF  
GHKGGFLCPFVYPLVLCILINTYLIINIGAGTWIRVLIWLLIGSMIYIFYGRSHSLNNAVYVPTMTCTRKT  
TDHLA

>At-CAT5 (At2g34960)

MEGEERGYWRWSKRDFPEESFQSFSGSYRAALSQTCSRFKNRLVRSDDENERFELKKQSEHEMKRCLTWDDL  
VWFGFGSVIGAGIFVLTGQEAHEQAGPAIVLSYVVSGLSAMLSVFCYTEFAVEIPVAGGSFAYLRVIELGDF  
AAAFITAGNILLESIVGTAAVARAWTSYFATLLNRSPNALRIKTDLSSGFNLLDPIAVVVIAASATIASISTRKTS  
LLNWIASAINTELVIFFVVIAGFIHADTSNLTFFLPFGPEGVFRAAAVVYFAYGGFDSIATMAEETKNPSRDI  
PIGLLGSMSIITVIYCLMALSLSMQKYTDIDPNAAYSVAFAQSVGMKWKYLVALGALKGMTTVLLVGA  
LQARYVTHIARTHMIPPIFALVHPKTGTPINANLLVAIPSAIAFFSGLDVLASLLSISTLFIFTMMPIALL  
VRRYYVRQDTPRVHLIKLITCLLFFVVSSMGTSAYWGMQRKGSWIGYTVTPFWFLGTLGIVFFVPQQRTPK  
VWGVPLVPWLPCLSIATNIFLMGSLGAMAFVRFVGVCTLAMLLEYFLGLHATFDMAHQQIVPRT

>At-CAT6 (At5g04770)

MEVQSSSNNGGHSSFSRLRVYLNSLSATPSRSLRRAISVSTSSDEMRSRVRAVSGEQMRRTLRLWYDLIGLGIGGMV  
GAGVFVTTGRASRLDAGPSIVVSYAIAAGLALLSAFCYTEFAVHLPVAGGAFSYIRITFGGEFFAFFTGANLVMY  
VMSNAAVSRSTAYLGTAFGISTSKWRFFVVSGLPKGFNEIDPVAVLVVIVITVVICCSTRESSKVNMMIMTAFHIA  
FIFVIVMGFIKGDSDKNLSSPANPEHPSGFFPFGAAGVFNGAAMVYLSYIGYDAVSTMAEEVENPVKDI PVGVSG  
SVAIVTVLYCLMAVSMMLLPYDLIDPEAPFSAAFRGSNGWEVWTKVVGIGASFGILTSLLVAMLGQARYMCVIG  
RSRVVFFWFAKIHPKTSTPVNASTFLGIFTAALALFTDLNVLLNLVLSIGTLFVFMVANALIFRRYVPVGP  
PTLCLTLFSITSLVFTLIWKLVPKPKAFMLGASAVVAIAIVLSFQCVPVQARKPELWGVFPMPWTPCVSIFL  
NIFLLGSLDAPSYVRFGGFFSGLVIVLVYLFYGVHASSDAEANGSFGVKDQVMKELIEV

>At-CAT7 (At3g10600)

MEAQYRNHDGDTSFSSLRVYLNSLSDTPSRFSRRAVSVSTSYDEMRSRVRAVSGEQMRRTLRLWYDLIGLGIGGMIG  
AGVFVTTGRASRLYAGPSIVVSYAIAAGLALLSAFCYTEFAVHLPVAGGAFSYIRITFGGEFFAFITGANLIMDYV  
LSNAAVSRGFTAYLGSAGFISTSEWRFIVSGLPNGFNEIDPIAVIVVLAFTFVICYSTRESSKVNMLTALHIAF  
IVFVIVMGFSKGDVKNLTRPDNPENPSGFFPFVGVGVFNGAAMVYLSYIGYDAVSTMAEEVKDPVKDIPMGISGS  
VAIVIVLYCLMAISMSMLLPYDLIDAEAPYSAAFSEKSEGEVWTRVVGIGASFGILTSLIVAMLGQARYMCVIGR  
SRVVPWFVFAKIVHPKTSTPVNASAFGLIFTAVLALFTDLNVLLNLVLSIGTLFVFMVANAVIFRRYVTVGYTEPWP  
TSLFLCLFSITSLVFTLVWQLAPSGPPKWFILGASTVTAIAIVQIFHCVVPQARIPFWGVPLMPWTPCVSIFLN  
IFLLGSLDAPSYIRFGFFSGLVIVLVYVYFYSVHASDAEGDGLDFKDVESLERINRVLS

>At-CAT8 (At1g17120)

MIPASMEEAHQLESRDDLSQRRSYWRWRKQDFPFESFQSFSTYKSALSATCPRLADRLLSRSSDAYELDAARR  
ESENPMRRLCTWDDLWLSFGSVVGVGVFVITGQEARVGGAPVVLVSYAISGVSALLSVLCYAEFGVEIPVAGGS  
FSYLRVELGDFIAFIAAGNILLEAMVGAAGLGRSWSSYLAASLVKNDSDYFRIVKVSFAKGFDDLDPVAVAVLLVA  
NGIAMTGTKRTSWNLITSMVTVCIIVFIVVVGFTHSKTSNLVPPFFPYGAKGVVQSAVVYWSYTGFDVANMAE  
ETEKPSRDIPIGLVGSMSMITVVYCLMALALTMVVKYTEIDANAAYSVAFAQIGMKWAKYLVGICALKGMTTSL  
VGLGQARYTTQIARSHMIPPWFALVHPKTGTPIYATLLVTLSSII SFFTSLEVELSSVFSFATLFI FMLVAVAL  
LVRRYVYKDVTPAAGLTKFLGFLFLIIASSIGVSALWNSGVKGIAYTVTGVIWFIGTLGLALLPKYRVPKVWGV  
PLVPWLPSFSIAMNLFILGSLGYVAFLRFI ICTMVMLLYYL FVGLHATYDVAHQPLEEAKFEGER

>At-CAT9 (At1g05940)

MGGHEGFSNQRLSSATWFSHFRAALRSKSLPPPSSQTAVRSTSGDSLVRRLGLFDLILLGVGASIGAGVFVVTG  
TVARDAGPGVTISFLLAGASCVLNLCYAEISSRFPVAVVGGAYMYSYSAFNEITAFVLFVQLMLDYHIGAASISR  
SLASYAVALLELFPALKGSIPLWMSGKELLGGLLSNLILAPILLALLTLVLCQGVRESSAVNSVMTATKVVIVL  
VVICAGAFEIDVANWSPFAPNGFKAVLTGATVVFVSYVGFDAVANSAAEESKNPQORDLPIGIMGSLVLCISLYIGV  
CLVLTGMVPSLLEDAPLAEAFSSKGMKFVSI LISIGAVAGLTTTLLVGLYVQSRRLYLGLGRDGLLPSIFSRH  
PTLHTPLHSQIWCIVAGVLAGIFNVHLSHILSVGTLTGYSVVAACVVALRLNDKKDRESSNRWTSWQEGVIC  
LVIIACSGFGAGVFYRFSASVIFILLVGVAVVASAVLHYRQAYALPLGSGFSCPGVPIVPSVCIFFNIFLFAQL  
HYEAWIRFVVVSVLATAVYALYQYHADPSMLDYQRAPETESDA

>Os-CAT1.1 (Os03g43970)

MAFVAAGNILLEYCIGGAAVARAWTSYFATLLNHPNDFRIHAASLAADYSRLDPIAVAVIAIICLLSVLSTKAS  
SRFNIVLSVLHVAVIAFII VAGLTKADAANLTRDFMPYGPGRGVFAASAVLFFAYIGFDAVSTMAEETRDPA  
VGLVGAMALTTALYCALAVTLCMLVPYGEIDPDAPFSVAFADRGMGWAKYVVAFGALKGMTTVLLVSAVGGQARYL  
THIARTHMPPWLARVHPGTGTPVNATVAMLLATAVIAFFTDLNVLSNLLSISTLFI FMLVAVALLVRRYVYVSGE  
TSRADRNRLAACIAAILASSVATATCWGLDRGGWVYAVTVPAWLAATASLWALVPQARAPKLWGVPMVPWLPSA  
SIAINVFLGSDSKSFMRFGIWTAALLVYYL FVGLHASDYDTAKALAADA VAGKVEDGDAKTSAPPM

>Os-CAT1.2 (Os12g41890)

MAEAAAGGEVRRRGCCGGGGGGGLFPEESFASWGAYGRALMETGPRLVERPTARSAAAVEVNEVRGRSGAEMK  
RNLTWDLAWFGVAVIGAGIFVLTGQEARDAAGPAVVLVSYAVSGVSAMLSVLCYTEFAIEIPVAGGSFAYLRVE  
LGDFVAFIAAGNILLEYCIGGAAVARAWTSYFATLLNHRPNDFRIHAASLAADYSRLDPIAVAVIAVVCALSVLS  
TKASSRFNYALSIAHLAVLVFIVTAGLSRRLSNLTADFAPFGARGVFAASAVLFFAYVGFDAVSTMAEETRDPA  
RDI PAGLVGAMAVTTAAYCALAATLCLMQPYREIDPDAPFSVAFSAAGMGWARYVVAFGALKGMTTVLLVSAVGG  
ARYLTHIARAHMAPPCLARVHPRLGTPVNATVAMLAATAAIALFTDLGVLNLLSISTLFI FMLVAVALLVRRYV  
ATGETARGDRNRLAGCLAVIVASSVATAAYWGLGGDGGGWAAVAVPAWLAATLFLQLRVPMARTPEKGVPLV  
PWLPSASIFINIFLLGSDGRSFMRFVWTAALLAYYFFFGLHASDYDTAKALAAEVAAGKVEEGGSKPAVGGAG  
N

>Os-CAT2.1 (Os03g45170)

MALDGGGEVGRRRRRRGWGGGFPSLMRRKQVDSDRVRAAEGEGQPQLAKELNIPALVAIGVGSTIGAGVYVLVGT  
VAREHAGPALTISFLIAGIASALSFAFCYAEASRCPSAGSAYHYSYICVGEVAVLIGWALVLEYTIGGSAVARG  
ISPNLALFFGGPDSLWPILSRHQLPWFDVIVDPCAAALVFVVTVLLCVGIKESSAVQELITVLNACVMIFVIVAG  
SYIGFQIGWVGKVDGYFPHGINGMLAGSATVFFAYIGFDTVASTAEVKNPQRDLPLGIGAALSICCCLYMMV  
SVVIVGLVPYFAMDPDTPISSVFAKHGMQWAMYIVTSGAVLALCSTLLGSLLPQPRILMAMARDGLLPSFFADV  
KRTQVPVKSTVVTGLCAAALAFFMDVSQLAGMVSVGTLLAFTIVAVSILILRYIPPDEVPLPSSLQETFCLSQEY  
DEERVSGILGDERCKTSETKDVILAESMEDPLIEKKITRKMDEMRRKVAAFSIGSVCVGMVLTSAASATWLPF  
LPMCIGCIVGALLLVAGLGLLCWIDQDDGRHSFGQSGGFCTPFVPLLPVLSILVNTYLLINLGGAEAWMRVGIWLL  
IGVLVYILYGRNTSSSLKDVIVPVAQADEIYKSSSGYVS

>Os-CAT2.2 (Os12g42850)

MGLEEGGAMRALMRRKQVDSDRVRAAGGHQLAKELSVTQLVAIGVGSTIGAGVYVLVGTVAREHAGPALTLSFLI  
AGVAAALSFAFCYAEASRCPSAGSAYHYSYICVGEVAVLIGWALILEYTIIGGSAVARGISPNLALFFGGQDSL  
WFLARHELPWFDVVDPCAAFLVLLVTTALLCKGIKESSEVQGVTVLNCVMLFVVIAGSYIGFQTGWVGKQVAG  
GFFPYGANGMLAGSATVFFAYIGFDSVASTAEVKNPQRDLPLGIGTALSVCSSLYMLVSVVIVGLVPYFAMDP  
TPISSAFARHGMHWAMYLVTGAVLALCSTLMGSILPQPRILMAMARDGLLPSFFSDVNQRTQVPVKSTIVTGIC  
AACLAFFMDVSQLAGMVSVGTLLAFTIVAVSILILRYAPPDEVPLPSSLEASFRLSQEYDEEKVRGPPVDANHEQ  
LSSVVESINDTLIEKKQDTSVEESKRKAAVCSISSVCVGVVLTTSASFTFLPFLLRCCFFCVFGLLLLAGLV  
LCYIDQDDGRHSFGHSGGFICPFVPLLPVMCILVNTYLLVNLGGGTWMRVGVWLVGMGVFVYIFYGRTHSSLTDVV  
YVPVAQAEIYSSSSSGFVA

>Os-CAT4 (Os10g30090)

MARRLSWQDLQASGSAIATRLSLQDLQCLVRRKPACSAADRAESSAAGAPAGGGKGRHLAKALSVPDLIAIGVGS  
TIGAGIYVLVGTVAREHAGPALTLSFLIAGIAALSALCYAELSCRFLAGSAYHYSYICIGESVAVLIGWALIL  
EYTIIGSSVARGISPNLALFFGGHEKLPFFLTQIHVKWFETPLDPCAAILVLIIVTALLCLGIKESSEVVEGII  
NIVIVMLFVICAGGYLAFQNGWWSGYNDEQGYFPKGVAGVLSGSATLFFAYIGFDAVASTAEVKNPQRDL  
TSLSCCFLYMMVSIIVIVGLVPYALDPNTPISSAFACYGMQWAVYIISTGAVFALIASLIGAILPQPRIVMAMAR  
DGLLPPLFSAVDPTTQVPTLSTILSGICAAIALFMDVSELAGMVSVGTLLAFTMVAISVLIIVRYAPPNEIATKV  
ALPGSSSELTSDSGYSEPDEENSEDLGQVQDIPTANEANKIRRQKAIACIILIFLGVVTVSSVSFSFFPLFLR  
SIAGAFGSLLLVSATIALWFIGQDKSSLRQTGGFMCPFPVILPVCCILINVYLLMNLGIHTWIRVSMWLAVGAI  
YVIFYGRKYSSLTGVAYQRISPA

>Os-CAT5 (Os01g11160)

MAAVDTPEKPYEGKPAEARSYWRWQKEDFFPEPSFASWGAYRAALAATPARFRDRFAGRSTDADELGALRRRSE  
NEMRRCLTWWDLTWFGFGSVIGAGIFVLTGQEAHDHAGPAIVLSYVASGLSAMLVFCYTEFAVEIPVAGGSFAY  
LRVELGDVAAFIAAANLILESIIIGTAAVARSWTSYLAASLINKPASALRIQTSLAEGYNELDPIAVVVIIVTATLA  
ILSAKGTSRVNWVASAVHVLVIAFVIVAGFLHAKTSNLTFFMPHGVPGVFRAAAIVYFAYGGFDNIATMAEETKN  
PSRDIPLGLLGSMSVITAIYCVMALVLSMMQPYTAIDRSAAYSVAFSNVGMRWAYVVALGALKGMTTVLLVGL  
GQARYTTHIARSHIIPVVFALVHPRTGTPVHATVLIAAAGACIGLFSLLDVLSSLLSVSTLFIIFMMATALLVRR  
YYVRGVTSRTHARRLVALLSVVIGSSAGIAAYWGAAPERWVGYTVLVPAAAGTLGIQLLVPAARAPKVVGVPLV  
PWLPSLSIATNLFMLGSLGAQAFIRFGVCTAIMLLYVVLVGLHATYDVAHGACSGDDVDEEVYADAHAHVDDAKAA  
AAVAANADVERAGAKI

>Os-CAT6 (Os11g05690)

MDKGALVVQVMDDSSNGGVGAAAAGGSFSSLRAYGRALAQTPRRLARRACAATSPEGEEMSRVRARSGARMARRLR  
WHDLVGLGLGGMVAGVFTTGRATRLYAGPGVVVSYAIAGLCALLSAFCYTEFAVDMPVAGGAFSYLRVTFGEL  
AAFLTGANLIMEYVFSNAAVARSFTAYLGTAVGVDAPSKWRIAVPGLPKGFNEVDLIAVGVILLISVCICYSTKE  
SSVVMVLTAVHVAFILFIIVMGFWRGDTRNLTRPVDLAHNPPGGFFPHGAAGVFNGAAMVYLSYIGYDAVSTMAE  
EVERPSRDI PVGVS SVVLTLLYCLMAASMSMLLPYDAIDTEAPFSGAFKGS SGWGWVSNVIGAGASLGILTSL  
MVAMLGQARYLCVIGRSGVMPAWLAKVHPCTATPVNASAFGLVFTAALALFTEL DVLLNLVSI GTLFV FVMVANA  
VYRRYVAADDDADHRRAPTLVFLAASFSLVALCFTLLWQFAPAGRARTGLLAACGAAAVATVGAFRALVAEAR  
RPELWGV PAMPVPAASVFLNVFLLGSLDRPSYVRFGGFTAAAVLVYVLYSVHASYDAEEGGGAGAGAAALDGA  
VQDEAADFKV

>Os-CAT7 (Os12g06060)

MARALRWPDLVGLGLGGMVAGVVFVTTGRATRRLYAGPAVVVSYAIAGLCALLSAFCYTEFAVDMFVAGGAFSYLR  
VTFGELAAFLTGANLIMEYVFSNAAVARSFTAYLGTAVGVDAPSKWRIAVPGLPKGFNEVDLVAVGVIILLITVCI  
CYSTKESSSVNMVLTAVHVLFIIMFVIVMGFWRGDTRNLTRPADPEHNPPGGFFPHGAAGVFNGAAMVYLSYIGYDA  
VSTMAEEVERPSRDIPIGVSGSVVLVTLTYCLMAASMSMLLPYDAIDTEAPFSGAFKGSWGWSNVIGAGASL  
GILTSLMVAMLGQARYLCVIGRSGVMPAWLARVNPRTATPVNASAFGLGVFTAALALFTELDILLNLVCIGTLFVF  
YMVANAVVYRRYVAAAEDDEEGRRRGAVPTLAFLLAFLSLVALCFTLVWKLAPRGGARTGLLVACGAAAAAAVAAF  
RALVPQARRPELWGPAMPWPVPAASVFLNVFLLGSLDRPSYVRFGGFTAAAALVYVLYSVHASYDADEAAAAALDG  
AKVLDEGCKV

>Os-CAT8 (Os06g34830)

MATAAAAGEGGSGRRYWRWSKADFFPEPSFASWRSYGGALAATVPRLVDRVGSRSSEAAEAGTLRAVSENPLRRC  
LSWLDLAFGLFGSVVSGVFLVTGQEARFDAGPAIPLAYAAAGFSALLSSFCYAEELATEIPSAGGSFSYLRVELG  
DIAAFLAAGNILLEAVVGAAGLGRSWSYLAALLGRDTSRLRHVPALAEGFNLLDPIAVVVLVSTSAVAMSGAR  
LTSTLNSLASVVGIAIIAFVLAAGFSHFADAGNLAFFFFGAAGVFRAAGVVYWSYTGFDVATMAEETKNPGRD  
VPLGLISSMSITVVYCLMSLALVGMQRYTEIDANAAYSVAFAAAGMRWARYVVALGALKGMTSGLLVGALGQAR  
YTTQIARTHMIIPPYFALVHPTTGTPIYATVAVTLGAACVALFSSLDVLASVSSISTLFIIFALVAVALLVRRYHVA  
GATTPGQLRFTFLAFLALVVLSSIGVSAYYNSRYARRWPGYAAFSGCWAAGAAGLAACAQKQARPRVYGAPLVPWL  
PAMSIATNFLMGLSGLTAAYARFGICTAAMLVYVYVLFVGHATYDVAHADDAADNLEHGKIAAAPAPTTPA

>Os-CAT9 (Os02g43860)

MTQEPTSLLPVWARAPTRRPKTRRHPLHLHEAAMEEEGADHRPPSSSSGGRGFLSGLCAAALRRKPI SAHAAHA  
ASGEGLVRLQGVFELVLLGIGASIGAGIFVVTGTVARDAAGPGVTISFVLGAAACVLNLCYAEELASRFPAVVGGA  
YLYTYAAFNELTAFLVFTQLMLDYHIGAASIARSLASYFVQFLELIPFLKGHIPTWIGHGEEFFGGVSVNIIAP  
ILLIILTITILCYGVKESAVNTFMTTLKIVIVIVVVVAGVFEVDVSNWSPFMPNGFKSVVVTGATVVFAYVGFDA  
VANSAAEAKKQQRDLPIGILGSLACVLLYVAVCLVITGMVPTYLLGEDAPLAEFAAKGLKFVTVLISIGAVAG  
LTTTTLLVGLYVQSRLYLGLGRDGLLPSIFAKVHPTRHTPLHSQIIVGCVAAVLAGLNFVHELSHILSVGTLTGYS  
VVSACVITLRWNDKTTSCRSLGNMSIWQEGVLCVLI IALCGFVAGMCRYFSYAI AFMI IALLIAVAAGFALQFRQ  
VYVDPGPGFSCPGVPIVPMVSVFFNMLLFAQLHEEAWYRFVILSLLAVGVYAGYGYHAVPSSSDHPPAVAYHGI  
PSEAP

>Os-CAT10 (Os04g45950)

MAALRDVLLSIAQTPHRLRRRALVTWTPAQETSEVRDRSGARMKRRLEWYDLVGLGVGMLGAGVFTTGRVARD  
TAGPAVFASYVIAGVSALLSSFCYAEFSVRVPAAGGAFSYLRVTFGELVGGGANILMEYVLSNAAVARSFTDY  
LASTCGITEPDAWRIQVDGIAKGYNALDFPAVALILVLTCLCYSTKESAMLMVITVFHLLFFVFI ILAGLWNG  
SARNLVSPHGLAPYGVGVLDGAAIVYFSYIGYDSASTMAEERDPARALPVGIAAGSVLVVSALYCLMSLALCAM  
LPYTEIAESAPFSAVFREKAGWEWAGSVVGAGASLGIVASLLVAMLGQARYLCVIARARLVPAWLAKVHPSTGTP  
MNATIFLGLCTASIALFTELQVVFEMISIGTLLVLYLVANALIYHRYAKLGANRSLHVLLFLLIILTSSSLGFSLS  
RRIHQCRWGMALFGATSVTITAMFHCARRDMPEPPSEWMVPLMPWPAASVFLNVFLMTTLKVMFQRFGLWS  
FVIIVFYVCYGVHSTYSAEENEAVNAMIHANMDIS

>Pt-CAT1 (Poptr1\_1:570928)

MGGVQADRGEIGIKKRGCSCTKDDFLPEESFRSWTNYVHAIRQTPVRFSDRLLTRSLDSTELNEIKSRSEHDMKKN  
LTWWDLMWFGVAVGAGIFVLTGLEARENTGPVVLSYVVSQVSAVSVFCYTEFAVEIPVAGGSFAYLRVELG  
DFMAFIAAGNILLEEYVIGGAAVARSWTSYFATLCNHQPDDFRI IAHSPLDDYGHLDPIAVVSSSLICVLAVLSTK  
GSSRFNYITSIMHVAVIVFII IAGLTKADRGNYPFMPYDVRGIFVGSVAVLFFAYVGFDAVSTMAEETENPARDI  
PIGLGSMITVTVAYCLLAATLCLMVPYKQLDGEAAFFSAFDYVGLHWAKYIVALCALAGMTTALLVSAVGQARY  
LTHIARTHMMPPWLAHVNAKTGTPVNATVIMLGATAIVAFFTKLNILSNLLSISTLFIIFTLVAVALLGRRYVSG  
VTTVPVNHKIFILCIATILGSSSTATSIIWGLGGDGWVGYVITVPIWFLGLTALAEVLVLPQARDPKLWGVPLVPWLPS  
ASIFINIFLLGSIDKASFERFGVWTGILLIYYFLFGLHASYDTAKESGENKAADGWKKMEEGVVSSQVEPEPESLNA  
NSAN

>Pt-CAT2 (Poptr1\_1:571264)

MGFLVGSQNGVRGGGCFRSLIRRKQVDSVHFKRHHQLAKELSVPHLIAIGVGSTIGAGIYILVGTVAREHSGP  
ALFISFLIAGIAAALS AFCYAELASRCPSAGSAYHYSYICVGEVAVLIGWALILEYTIIGGSAVARGISP NLALF  
FGGQDSL PFFFLARQHIPGLDVVVDPCA AVLVLVVTGLLCVGIKESTLAQAVVTSINVCAMLFII IAGSYLGFKTG  
WAGYELPAGYFPFGVDGMLAGSATVFFAYIGFDSVASTAEVKNPQRDLPLGIGLALSICCCLYMLVSVVIVGLV  
PYYAMPDPTPISSAFAAYGMQWAAAYLVAAGAVMALCSTLMGSI LQPRI LMAMARDGLLPSFFSDINKKSQVPVK  
STLVTGLGSAVLAFFMDVSQLAGMVS VGTLLAFTMVAISVLILRYVPPNEVPFPSSLQEI IDSVSLRYSTGSPDV  
TKEKSGFYAGTSMDSNLPLL GKATAIEYPIIVEQE AQGNFVINEGSRRKIAGWTITATCVGAFLLAYAASDLNLP  
RLLRFIVCGIGGALLLFLGLIVLTCIEQDDARHTFGHSGGFICPFVPLLP IVCFLVNIYLLINLGAATWTRVSVWL  
IVGVLVYTFYGRTHSSLLDAVYVPATHADEIYRSSGESSA

>Pt-CAT3 (Poptr1\_1:573976)

MGFLVDSHKGCGVGGGCFRSLIRRKQVDSVHSHKGGHRLAKELSILHLIAIGVGSTIGAGVYILVGTVAREH  
SGPALFLSFLVAGIAAALS AFCYAELASRCPSAGSAYHYSYICVGEVAVLIGWALILEYTIIGGSAVARGISP NL  
ALFFGGQDNLPTFLARQHIPGLDVVVDPCA AVLVLVVTGLLCVGIKESTLAQAVVTSINVCAMLFII IAGTYLGF  
KTGWAGYELPTGYFPFGVDGMLAGSATVFFAYIGFDSVASTAEVKNPQRDLPLGIGLSLSICCSLYMLVSVVIV  
GLVPPYAMPDPTPISSAFSVHGMQWAAAYLITAGAVMALCSTLMGSM LQPRI LMAMARDGLLPSFFSDVNRSTQV  
PVKSTLVTGFGAAVLSFFMDVSQLAGMVS VGTLLAFTMVAISVLILRYVPPDEVFPFPSSLQETIDSVSLRYSSQD  
VYEEKAAIHAGTSKDSKPLLLGKAKTIEYPLLVKQEAQSNFV LNEGKRREIAGWTIAATCIGAVLLTYAASDLSL  
PSPLRFTTCGVGGALLL SGLIVLTCIEQDDARHSFGHSGGFICPFVPLLP IVCILVNIYLLINLGAATWTRVSVW  
LIVGVLVYVFYGRKHSSLRDAVYVPATHADEIYRSSGESLA

>Pt-CAT4 (Poptr1\_1:248775)

RRKQVDSHRVSSHSGGQTQQLAKILSVVDIIAIGVGATIGAGVYILVGTVAREQTGPALTVSFFIAGIAAALS AF  
CYAELVCRCP SAGSAYHYTYICIGEGA AWLVGWALILEYTIIGGSAIARGLTPNLALFFGGQDNLPSYLARHSIPG  
LGIVVDPCA AVLILVVTLLLCIGIKESSFAQT VVTVNVFGLLFI IIVGGYLAFKTEWIGYELPSGYFPFGVNGM  
LAGSAVFFSFIGFDVASTAEVKNPQRDLPLGIGVALSIC CILYMLVSVVIVGLVPPYALDPDPTPISSAFASH  
GMQWAVYI IITGAVTALCASLMGSLLPQPRMFMAMARDGLLPSFFSDI SERTQVPVKSTVI IIGILAAALAFVMDV  
SQLAGMVS VGTLLAFTSVAVSVLILRYVPPNEVPLHPSLQQLIDSPSLQFN SDSQDIAYQNPKGEQNEQKRRKIA  
AWNIALVCVGVFVLSAASVENIP SILRFTLCTVGGAI FLCSLIVLACLAQDNARHSFGHSGGFVCPFPVFLPVA  
CILVNTYLLVNLGAGTWFRVSIWLLIGALVYLFYGRTHSSLLKNAVYVPT

>Pt-CAT5 (Poptr1\_1:800060)

MSDEIQHKS YWRFSKQDFLPEESFQSWGNYSALSETCFRFDRLISRSDDVNEIGELRKQSENEMKRCLTWDDL  
TWFGFGSVV GAGIFVLTGQEAHEHAGPAIVLSYVASGVSAMLSVFCYTEFAVEVPVAGGSFAYLR IELGDFVAFI  
TAGNILLESIAGSAAVARAWTSYFTNLLNRPSNSLR IHTNLAEGFNLLDPIAVGVLVIAATIAI ISTRKTSLINW  
IATALNTAVILFV IAGFAHANTS NLKPF LFGAKGIFQAAAIVYFAYGGFDNIATMAEETKNPSRDIPIGLLGS  
MSIITVIYCLMAL TLSMMQKYTEIDKGAAYSVA FQSVGMNWARYLVALGALKGMTTVLLV GALGQARYTTHIARA  
HMIPPFALVHPKTGT PINATLLITISSALIAFFSSLDV LASLLSVSTLFI FMMMAVALLVRRYHVRDITPQTNL  
LKLALFLLI IISSSMGTSAYWGLNPNGWVGYAITIPFWFLGTIGLSMLPQQREPKVWGVLPVLPWLP SLSIAINIF  
LMGSLGAEAFERFGICTVVM LIYYVFFGLHATYDMAHLHRKAQSTEVNNE DMIGRKG P

>Pt-CAT6 (Poptr1\_1:264766)

VRLRSGADMMRKLKWDLI ALGIGGMLGVGVFVTTGLVAHQISGPSVFISYI IAGISALLSSLCYTEFSVQIPVA  
GGAFSYLRVTFGEFVGYFAGANILMEYVLSNA AVARTFTEYLCHAVGENPNSWRFEVDGLVEGYNKLD FPAVALI  
LLLTLCLTKESSV LNLVMTVFHLIFFGFII IAGFYKGS AKNLVEPGGLAPFGVKGILDGAATVYF SYIGYDSVST  
MAEEIRNPAKSLPVGIVGSVLIVTGLYCLVALS LCFVYPNMIDK DASFSVAFQKIGWKWAGNVV GAGASLGIVA  
SLLVAMLGQARYLCVIGRARLVPSWLAKVNPSTGTPLNATLFLGLCTASIALFTELHII IDIISISTLLV FYLVA  
NALIYRRYVIVSHNPPSQ TLLFLFLSSCSIGFSMSWKLEEQWVLPVFGGFMITITAFFQYMVPSICQTNEEWS  
VPFMPWPAVASIFLNVFLV TSLKIPSFQRFGIWA CLITLFYVLYGVHSTY

>Pt-CAT7 (Poptr1\_1:423928)

YLQSLSQTPHRLRKRMLATWTPDQELNQVRLRSGADMMRKLKWDLI ALGIGGMLGVGVFVTTGPVALKTSGPSV  
FISYII IAGISALFSSLCYTEFSVQIPVAGGAFSYLRVTFGEFIFGYFAGANILMEYVLSNA AVARTFTEYLCHAVG  
ENPSSWRIEVDGVAEGYNMLDFPAVALI LLLTLCLCHSTKESSILNLIMTVFHVIFFGFII IIVGFSKGSARNLVE  
PGGLAPFGVKGVLDGAAIVYF SYIGYDSVSTMAEEIQNPAKSLPVGILGSVLIVTGLYCLMALS LCVLPFN MID  
KDASFSVAF EKIGWKWASNVV GAGASLGIVASLLVAMLGQARYLCVIGRARLVPSWFAKVN PSTGTPLNATLFLG  
LCTASIALFTELSIILEI ISISTLLV FVMANALIYRRYVVISHNPPSRTLLFLVLLSSTAIGFSMSWKLDEQWW  
ALPVLGGFMIAITAFFQYKVP SVCQPNEEWSVPFMPWPAVTSIFLNVFLMTTLKARSFQRFGIWA FLITLFYVLY  
GVHSTYRAE

>Pt-CAT8 (Poptr1\_1:798197)

MDVQDSPRKSYSWRCSKQDFPFPEPSFKDLSSYRTALSQICPRLKDRLLSRSTETHELVTLRRESENPQKCLTWWD  
LMWMSFGSVVGSIGFVITGQEARNDAGPAIVLSYALSQFSGALLSVFCYTEFAVEIPVAGGSFSYLRVELGDFIAY  
LAAGNILLEAIIIGAAGLRSSWSSYFASMINSKNPDMRIKIDSFADGFNLLDPLAVVVLLVANSIAMSQKTRTSF  
LNWIASIATAFIIAIIIVVGFIFHKSSNLVYPFKGAEGVFVSAVVYWAYTGFDMVATMAEETKNPSRDIPIGL  
VGSMSIITVIYCLMAMALTGMVKYTEIDPNAAFSVAFAQIGMNWATYLVSIKALGKMTTSLMVGSLGQGRYTTQI  
ARSHMIPPWFARVHPKTGTPINATLLTTILSAIVAFFSSLDVLSVFSICTLLIFMLLAVALLVRRYYVKDVTSK  
NDSVTFVSLFTIVGSSIGVTALWNSGVRGWIGYVVASVIWCSGTLGISLLHKKHRVPKVVGVPLVPWLPSLSIAM  
NVFLLGSLDYEAFRLFIIICSAVMILYYLMIGVHATYDVAHQPKETEAEEGR

>Pt-CAT9 (Poptr1\_1:755066)

MGAQKTPSPSSSSSSSSWFSHFCSALRTPINSPLDTILVSRNSTDALVRRRLGLLDLILLGVGASIGAGIFVVT  
GTWARDAGPGVTLSEFILAGLSCVLNLCYAEASRLPAVVGAYLYTYSAFNELTAFLVFGQLMIDYHIGAASIA  
RSLASYVVTILEMFPVFKDNIPSWIGHGGEFFGGTSLINLLAPFLLALLTVILCLGVGESSIVNSFMTVLKVII  
VIIIVIFVGAFEVDVSNWSPFAPHGVKEILTGTATVVFAYVGFDAVANSAAESRRPQACSVDLRDLPLGIIGSLVI  
CIALYIGVCLVLTGMVPYLLGEDAPLAEAFSTKGLKYVSIISIGAVAGLTTTLLVGLYVQSRLYLGLGRDGLL  
PSLFSKVHPTRHPTIHSQVWVGIVAGTLGGLFNVHVLSHILSVGALTGYSVVSACVLALRWKDKTASQFSSRWTS  
AWREGVLCIVTVACCGFAAGLFYRFSASFIFLVAVVIAIALATAALCCRQTYTNPPGFCPGVPIVPAVCVFFNM  
FLFAQHLHEAWVRVFLSIIIMVGIYAFYQYHAKPGSDESIYQRAPTEATR

>Pt-CAT10 (Poptr1\_1:567910)

MESSHGSSFSSSLNSYIQALAQTPARFARRAGSVSTSYEEMSRVKARSGSDMQRTLRLWYDLVGFVIGGMVAGVVF  
TTGRASRVCTGPSVIIISYAIAGLCALLSAFCYTEFAVDMPPVAGGAFSYLRVTFGEFAAFLTGANLIMDYVMSNAA  
VARSFAYLGSAGISTSKWRVVVHVLDPDFNEIDI FAVLVVLAITLIICYFRLLNMTSLFLVDSTRESSVNM  
VLTALHILFIGFVILMGFWKGDWKNFTEPADPKNPSGFFFPFAGPVGFNGAAMVYLSYIGYDAVSTLAEVHNPVK  
DIPIGVSGSVIIVTVLYCLMSASMSMLLPYDMIDADAPFSAAFRGKSDGWKWSNVIGIGASFGILTSLLVAMLG  
QARYMVCVIGRSNVVPAWFARVHPKTSTPVNASAFLGIFTAAIALFTDLNVLNLSIGTLFVFMVANAVVYRRY  
VAIGTTNPWPTLAFLCSFSLTSILFTLIWHFMPQGGKAFMLGACAVIAIAIQLFHCLVLPQARKPEFWGVPMLP  
WIPCVSIFLNIIFLLGSLGGPSYVRVFFSALAVLVYVLYSVHASFDAEAEGSFGQKNGGILKESGESDQDPSFKV

>Pt-CAT11 (Poptr1\_1:806659)

MRRRRGCGCCTKNDLPEESFQSIGNYLQALKETPMRFKDRLLTRSLDSTELHEIKSRSDHEMKKNLTWWDLIW  
FGIGAVIGAGIFVLTGLEAKEHAGPAVLSYVVSGVSAMLSVFCYTEFAVEIPVAGGSFAYLRVELGDFMAFIAA  
GNIILEYVIGGAAVARSWTSYFATLCNHKPDDEFRIIAHSLPEDYGHLDPIISVFCVAAICVLAVLSTKGSRFNYV  
ASIIHVVVILFIIIVAGLAKADTKNYADFSPNGARGIFVASAVLFFAYIGF'DAVATMAEETRNPAARDIPIGLVGS  
SITTIAYCLMAVTLCLMVPYKIDEDAPFSVAFETVGGWGWAKYVVAAGALKGMTTVLLVSAVQARYLTHIARTH  
MPPWLAHVNERGTGPVNATIVMLAATAIVGFFTKLDILSNLLSISTLFI FMLVALALLVRRYYVSGITTOENRV  
KLIMCIVAILGSSIATAVFWGTADEDSWLGYVITIPWFCATLALKLLVPQARDPKLWGVPLVPWLPSASILINI  
FLLGSIDKKSFIIRFAAWTGFLLVYVYFLFGLHASYDTAKASGENKVEDGLKNVEEGAVPSRNGS

>Pt-CAT12 (Poptr1\_1:808200)

MGGGDIHIDHQEEGLRRRGCGCSCSKNDLPEESFQSGFNYLQALKETPMRFKDRLLTRSKDTTEIHEIKARSEH  
EMKKTLTWWDLIWFGIGAVIGAGIFVLTGLEAREHAGPAVLSYVVSGVSAMLSVFCYTEFAVEIPVAGGSFAYL  
RVELGDFMAFIAAGNILLEYVIGGAAVSRAWTSYFATLCNHKPDDEFRIIAHSLPDDYGHLDPIAVLVGVVICILA  
VLSTKGSRFNYVASIIHVVVILFIIIVAGLAKADTKNYADFAPNGAHGIFTASAVLFFAYVGFDAVSTMAEETKN  
PARDIPIGLVGSMAITTLAYCLLAVTLCLMVPYKMIIDVAPFSVAFESVGGWGWAKYIVAAGALKGMTTVLLVSAV  
QARYLTHIARTHMMPPWLAHVNAKTGTPVNATVVMLAATAIAFFTKLDILSNLLSISTLFI FMLVAVSLLVRR  
YYVSGVTTVPVNRVKLIVCIVAILVSSIATALIWGTSQASWIGYVITIPWFFATLALKISVPQAKDPKLWGVPL  
VPWLPSASILINMFLGSDVQSFKRFAVWTGILLIYVYLLFGLHASYDTAKASGENKDEGGFKNVEDGTVSSQND  
AL

>Sb-CAT1.1 (Sb01g013690)

MAVGGEVGRQRQRCSCCTKADFFPEESFSSWSAYGRALRSTVSRSLADRVTSRSLLETTELHEVRARSGADMKRDLT  
WWDLAWFGVAVIGAGIFVLTGQEARNDVGPVAVIISYVVSGVSAMLSVFCYTEFAVEIPVAGGSFAYLRVELGDF  
MAFVAAGNILLEYCIGGAAVARAWTSYFATLLNHQPSDFRIHASGLDANYSELDP IAVVVIALVCI FASASTKGT  
SRFNYVLSVHVIAVIFIIIVAGLTKADAANMRDFMPFGVGRGIFSAVAVLFFAYIGF'DAVSTMAEETKNPARDIPI  
GLVGAMTLTALYCVLAVTLCLMQPYSSIDADAPFSVAFSARGMDWAKYIVAFGALKGMTTVLLVSAVQARYLT  
HIARTHMMPPWLAQVHPRTGTPVNATVVMLVATAVIAFFTDLGLILSNLLSISTLFI FKLVAVALLVRRYYVAGET  
TTANRNKLAACIAAILATSTATATCWGVDINGWVYAVTVAWFVSTVCLWAFVLPQARAPKLWGVPLVPWLPSAS  
IAINVFLGSDSKSFMRFYWTAAALLVYVYLFVGLHASYDTAKALAAESAIAKVENGDDKPARGAVHNGV

>Sb-CAT1.2 (Sb08g021380)

MAASGGGKGGGGEGGCCGGTTLFPEESFRSWSAYGRALLEGTGPRLRDRLTARSLDATEVNEVRGRSGADMRRNLT  
WWDLIWFGIGAVIGAGIFVLTGQEAKEAAGPAVVVSYAISGVSAMLAVFCYTEFAIEIPVAGGSFAYLRVELGDF  
MAFIAAGNIILEYICIGGAAVARSWTSYFATLLNHHPDDFRVHAAALAEGYSELDP IAVAVTAAICALAVLSTKGS  
SRFNYSILHLVVI AFIVVVGLTKANAANLTADFAPFGARGIFAASAVLFFAYIGF DAVSTMAEETKNPARDIP  
VGLVGAMTLTTAVYCLLALVLCMQPYTEIDANAPFSVAFTAVGMDWAKYIVAFGALKGMTTVLLVGAVGQARYL  
THIARTHMVPPCLAQVHPRFGTVPYATIVMMVATAVIALFTNLGILSNLLSISTLFI FTLVAMALLVRRYVAGE  
TTASDRNKLVAACLAVIVASSTATAACWGTSSGGGGWVAVVTVAAWLAATAYLQWGVPKARAPKMWGVPLVPWL  
PSASIFINIFLLGSIDGASFMRFLIWTAALLAYYFFVGLHASDYDTAKAVAAEAEAEARVEEGARKVAVGGCRFD

>Sb-CAT2 (Sb01g013100)

MALEAGSSGGGGRGWGGGFRSLMRRKQVDSDRVRAKQPQLAKELNVPELVAIGVGSTVGAGVYVVLVGTVAREHA  
GPALTISFLIAGIAAALS AFCYAE LASRCSAGSAYHYSYICVGEVAVLIGWALVLEYTIGGSAVARGISP NLA  
LFFGGQDSL PWILARHQLPWF GIIVDPCAAALV FVVTVLLCVGIKES SFAQGVVTVLNACVMIFVIVAGSYIGFQ  
IGWVGKVS DGYFPHGVNGMLAGSATVFFAYIGFDTVASTAEVKNPQRDLPLGIGAALAI CCVLYMAVSVVIVG  
LVPYFAMDPDTP ISSAFTEHGMQWAMYVVTSGAVLALCSTLMGSLLPQPRILMAMARDGLLP SFFSDVNKQTQVP  
VKSTIVTGIFAAALAFAMDVSQ LAGMVS VGTLLAFTIVAVSILILRYVPPDEVP LPPSMQESFHLNQECDEETDR  
GLLVGNCNLSQTKNVI VVSVKDP LIDKRLHKGKMD ETKRRKIASLSIASVCVGV LILTSSASATWLPFLPIC  
IGCIIGVMLLLAGLSLLSWIDQ DAGRHSFGHSGGFTCFVPVLPVLCILINTYLLINLGGDTWMRVGIWLLMGVL  
VYVYGRTHSSSLTDVVYVPVAQADEIYRSSSGYVS

>Sb-CAT4 (Sb01g021240)

MAMGGPSWTNLQCLVRRK LATASSAGWAEDADRGGGQRLARTLSVPHLAAIGVGSTIGAGIYVVLVGTVAREHTGP  
GLTLSFLIAGVAAALSALCYAELSCRFP SAGSAYHYSYICIGESVAVLIGWALILEY TIGGSSVARGMSPNLALF  
FGGQDKLPFFLAQVHVKGLDTP LDPCAAILVLI V TALLCLGIKES SVEGIITTANIIVMLFVICAGGWLGFRNG  
WGYKVP EGYFPNGVSGVLSGSATLFFAFIGFDTVASTAEVKNP RRDLP LGMAL TSLCCFLYMMVSAVVVGLV  
PYHAMDPDTP ISSAFARYGMQWAEYVSSGAVLALVASLIGGILPQPRIIMAMARDGLLP LFSVDNRR TQVPIL  
STVLIGICAILAFFMDVSQ LAGMVS VGTLLAFTTVAISVLVRYAPPYEMPEVALAGSSESLASFSGNLEHDE  
QNSDPFGNVQEALTVIEGASKVRRQKAIGSIVL I CVGAILISAVSVSFLPFSVQT IACTVGGLVVLS SSVILL  
CIGQDKRFLGQTGGFMCPLVPLLPICCIIVNLYLLMNLGSH TWIRVSIWLVAGALIYFFYGLKHSSLAGMAYHRI  
SPL

>Sb-CAT5 (Sb03g002130)

MAPAEHDEGAGKAAVPARSYWRWHRDDFFPEPSFASWGAYRRALGETPSRLRDRLAGRSTDAEELGALRRRSENE  
MRRCLTWWDLTWFGFGSVIGAGIFVLTGQEAHDHAGPAIVLSYVASGLSAML SVFCYTEFAVEIPVAGGSFAYLR  
VELGDAAAFIAAANLILESVIGTAAVARSWTSYLASLINKPASALRIHAPGLAPGYDELDP IAVVVIAVTATLAM  
LTAKGTSRVN WVASAVHVVVIGFVIVAGFIHANPANLRPFMPYGVPGVFRAAAI VYFAYGGFDNIATMAEETKNP  
SRDIP LGLLGSMSVITAIY CIMALVLSMMQPYTAIDTSAAYSVAFASVGMHWAQYVVALGALKGMTTVLLVGALG  
QARYTTHIARSHIIPVFALVHPRTGTPVHATALIAVCSACIALFSSLDVLS SLLSVSTLFI FMMMATALLVRRY  
YVRGV TTRTHALRFTALLLLIVASSVGI AAYWGTSPERWQGYVVLVPAWAAATLGIQLLVPAARAPKVWGVPLVP  
WLPSLSIATNLFMGLSGKDAFIRFGVCTAVMLVYVVLVGLHATYDVAHGACGG EEDDDGDAADGEKKKVVAAS  
DVEKADAAGGAL

>Sb-CAT6 (Sb05g003440)

MDKAALVSESTDDVGPAGGSSSSSFSGLRAYGRALAQT PRRLARRACAATAPHEEMSRVRARS GTRMARALRWWD  
LVGLGLGGMV GAGVFVTTGRAARLYAGPGLVVS YAIAGLCALLSAFCYTEFAVDMPVAGGAFSYLRVTFGEFAAF  
LTGANLIMEYVFSNAAVARSFTAYLGTAVGVDAPSKWRIPVPGLP EGFNQVDLVAVGVILLLSVCICYSTKESSV  
VNLVLTGVHVAFILFIIVMGFVHGDARNLSRPADPVHNP GGFPHGAAGVFNGAAA VYLSYIGYDAVSTMAEEVE  
RPDRDIPAGVSGSVLVTALYCLMAASMSMLLPYDAIDPEAPFSGAFKGRDGM AWVSNVIGAGASLGIL TSLMVA  
MLGQARYLCVIGRSGVVP AWLARVDRRTATPVNASAF LGLLTAALALFTELDVLLNLVSI GTLFV FVMVANAVVY  
RRYVGDPCPAGTGT AHETRAWPTLAFIGAFSLIALSFTLLWQFAPGGA AKAVMLSATAAAAVAVVA AFQALVPQA  
REPEVWGVPGMPVWPAASVFLNVFLLGSLDRPSYARFGFFSAAVVLYVLYSVHASYDAEEGGAAADGGAGAGDK  
LQDHGCEV

>Sb-CAT7.1 (Sb08g003570)

MSRVRARSGADMARALRWDDLVLGLGGMVAGVFTTGRAARLHAGPGVVVSYAIAAGLCALLSAFCYTEFAVDL  
PVAGGAFSYLRVTFGELAAFLTGANLIMEYVFSNAAVARSFTAYLGTAVGVDAPSQWRITVHALPDGFNQVDLVA  
VAVILLITVCICYSTKESVVMVLTAVHVAFILFIIGMGFRHGDARNLTRPADPSRSPGGFFPHGAVGVFNAAA  
MVYLSYIGYDAVSTMAEEVQRPARDIPVGVSGSVVVVTVLYCLMAASMSMLLPYDAIDPEAPFSGAFKGRERCAW  
VSNVIGAGASLGILTSMLVAMLGQARYLCVIGRSGVMPAWLARVNPRTATPVNASAFGLGVFTAALALFTELDILL  
NLVCIGTLFVYFYMVANAVVYRRYVGGGGGARWPTLAFLLVFSLSALAFTLAWKLAPPEPRGVRAGLLAACAALAV  
TAVAAFQALVPQARVPELWGPVPGMPWVPAASVFLNVFLLGSLDRPSYVRFAlFSAAALLVYVLYSVHASYDAEES  
GRLDVGDDGGGKVQDEACTVV

>Sb-CAT7.2 (Sb08g003530)

MSRVRARSGADMARALRWDDLVLGLGGMVAGVFTTGRAARLHAGPGVVVSYAIAAGLCALLSAFCYTEFAVDL  
PVAGGAFSYLRVTFGELAAFLTGANLIMEYVFSNAAVARSFTAYLGTAVGVDAPSQWRITVHGLPDGFNQVDLLA  
VAVILLITVCICYSTKESVVMVLTAVHVAFILFIIGMGFRHGDARNLTRPADPSRSPGGFFPHGAVGVFNAAA  
MVYLSYIGYDAVSTMAEEVQRPARDIPVGVSGSVVVVTVLYCLMAASMSMLLPYDAIDPEAPFSGAFKGRERCAW  
VSNVIGAGASLGILTSMLVAMLGQARYLCVIGRSGVMPAWLARVNPRTATPVNASAFGLGVFTAALALFTELDILL  
NLVCIGTLFVYFYMVANAVVYRRYVGGGGGARWPTLAFLLVFSLSALAFTLAWKLAPPERRGVRAGLLAACAALAVT  
AVAAFQALVPQARVPELWGPVPGMPWVPAASVFLNVFLLGSLDRPSYVRFAlFSAAALLVYVLYSVHASYDAEESG  
RLDVGDDGGGKVQDEACTVV

>Sb-CAT8 (Sb10g021160)

MTSAAVRGEPAAGHRRYWRWSKADFFPEPSFQSWRAYGGALLSTGPRLRDRVTSRSSEAVEAGTLLAQSENPLRR  
CLSWVDLAFGLFGSVVGVFVLTGQEARFDAGPAIPLAYAAAGFSALLSSFCYAEELATEIPSAGGSFSYLRVEL  
GDLAFFIAAGNILLEAVVGAAGLGRSWSYLAALIGRSDALRIHVPALADGFNLLDPIAVVVLCTTSALAVSGA  
RLTSTINSVASVVGIAIVAFVLAAGFSHFEPANLAPSFPPFGAAGVFRAAAVVYWSYTGFDVMATMAEETKNPGR  
DVPLGLISSMSAITLVYCAMSLALVGMQRYSDIDANAAYSVAFAAAGMKWARYIVALGALKGMTSGLLVGALGQA  
RYTTQIARTHMIIPPYFALVHPRTGTPIYATIAVTLGAACVALFSSLDVLAASVSSISTLFI FALVAALLVRRYV  
AGTTSPAQARTFLAFLALIVLSSIGMSVYYSSGYAARWPGYVVFALWAAGTAGLALFAKQQRAPKVVYGAFLMPW  
LPAMSVATNLFMLGSLGSLAYMRFGICTAAMLVYYVLFVGHATYDMVHAEGQTTSAADAATDGEVQRKIMPV

>Sb-CAT9.1 (Sb04g033040)

MTQEPTSLRSIWARTRPRTRPKSRRHQLPISSDAMEEAHGRPSSTAGRPFSLGCAAALRRKPLGAHGSAAAAA  
TGEGLVRQLGVLELVLLGIGASIGAGIFVVTGTWARDAGPGVTISFVLGAAACVLNLCYAEELASRFPVAVGGAY  
LYTYAAFNEITAFVFTQLMVDYHIGAASIARSLASYFIQFLELIPFLKGQIPSWIGHGEEFFGGVISINILAPI  
LLIILTAILCRGVKESAVNTFMTTLKIIIVIVVVVAGVFEVDVSNWSPFMPNGFKSVVTGATVVVFFAYVGFDAV  
ANSAEEAKRPQRDLPIGILGSLACVLLYVAVCLVITGMVPTYLLGEDAPLAEFAAKGLKFITVLIISIGAVAGL  
TTTTLLVGLYVQSRLYLGLGRDGLLPSVFAKVHPTRHTPLQSQIIVGCVAAVMAGLFNVSMLSHILSVGTLTGYSV  
VSACVVTLRWNDKGTSSRSLGSMISWQEGVLCLVIVALCGFIVGICYRFNYAIAFMVFAFVIAVAASAFALQFRQV  
YVDPPGFSCPGVPLLPISVFFNMVLFQALHEEAWYRFVILSLIALGVYAGYQYNAVPSSENSTIGYHGIPTE  
AP

>Sb-CAT9.2 (Sb04g033020)

MEEANDHRSSSTAGRPFSLGFCAAALRRKPLGAHGSAAATGEGLVRQLGAVELVLLGIGASIGAGIFVVTGTVAR  
DAGPGVTISFVVAAGAACVLNLCYAEELASRFPVAVGGAYLYTYAALNEITAFVFTQLMVDYHISAASARSLAS  
YFIQFLELIPFLKGQIPSWIGHGEEFFGGVISINILAPIILLIILTAILCCGVKESAVNTFMTTLKIIIVIVVVV  
AGVFEVDVSNWSPFMPNGFKSVVTGATVVVFFAYVGFDAVANSAAEAKRPQRDLPIGILGSLACVLLYVAVCLVI  
TGMVPTYLLGEDAPLAEFAAKGLKFVTVLISIGAVAGLTTTTLLIGLYVQSRLYLGLGRDGLLPSVFAKVHPTRH  
TPLQSQIIVGCLAAVLAGLFNVSMLSHILSVGTLTGYSVVSACVITLRWNDKGTSSRSLGSMISWQEGVLCLVIV  
ALCGFIVGLCYRFNYAIAFMVFAFVIAVAASAFALQFRQVYVDPPGFSCPGVPLLPISVFFNMVLFQALHEEAWY  
RFVILGLIALGFYAGYQYNALPSSSEHSTIGYHGIPSEAP

>SbCAT10 (Sb06g024120)

MALRDVLLSIAQTPHRLRRRALVTWTPAQELNEVRDRSGPRMKRRLEWYDLVGLGVGMLGAGVFTTGRVARDT  
AGPAVFSYVIAGVSALLSSFCYAEFSVRVPVAGGAFSYLRVTFGEFVGGFFGANILMEYVLSNAAVARSFTDYL  
ASTFGVTEHNAWRIVVDGIADGNALDVPVAVGLILLITVCLCYSTKESMLNMVLTVFHLLFFAFIIAAGLWNGS  
ARNLVRPHGLAPYGVAGVLDGAAIVYFSYIGYDSACTMAEIREPSRALPVGIAAGSVLVVSAALYCLMSVALCVM  
PYTEVTMHAYAGGVARSRPVARSISEAAPFSSAFREKVGWRWASSVVGAGASIGIVASLLVAMLGQARYLCVI  
ARARLVPLWFAKVHPSTGTPMNATIFLALALFTELQIVFEMISIGTLLVYFYLVANALIYHRYVKIGTNRPLHVLL  
FLLLLTSSLGFLSRKIDEWCRWGMALFGAISIAITTIHFCTARQDITGPPLEWSVPLMPWPAASVFLNVFLI  
TTLKVRSFQRFGIWLSLVIIVFYVCYGVHSTYSAEENEIVNAMIHGANLDIS



>Vv-CAT1.1 (GSVIVP00028403001)

MGVEPSEGVRRCSCSKDDFLPEESFKTWGNYGRALAEIPARLKDRLLTRSLDTEMNEIKARSAHEMCKTLTW  
WDLMWFGIGAVIGAGIFVLTGIQARDVAGPAVVLSYVVSGISAMLSVFCYTEFAVEIPVAGGSFAYLRVELGDFM  
AFIAAGNILLEEVIGGAAVARSWTSYFATLCNHNKPEDFRIIAHSLKEDYNQLDPIAVGVITIIICLLAVFSTKSS  
RFNYIASIFHVIVILFII IAGLCKADTSNYTPFAPNGVRGIFKSSAVLFFAYIGFDVAVSTMAEETKNPGRDIP  
LVGSMISITTLAYCLLAVTLCLMQKYTDIDKDAPFSVAFEAVGWNWAKYIVAAGALKGMTTVLLVSAVGQARYLTH  
IARTHMMPPWLAHVNSRTGTPVNATIVMLVATAIIAFFTDLGILSNLLSISTLFI FMLVAVGLLVRRYVSNPKL  
WGVPLVPWLPSASIAINIFLLGSDIKASFERFGIWTAVLMVYVYFFFLHASDYDTAKESAKVTHETTQYKKVEEGA  
VTPSVDSSTGVNASNASTNP

>Vv-CAT1.2 (GSVIVP00028405001)

MGNTSEGGGVARKRCGWTKEDFLPEESFQSWGTYVKALGNTTARLKDRLTRSLDEVELHAVRDRSKNEMCKTL  
NWDLLWFGIGAVMGSGIFVLTGEEANEYAGPAVVLSYFISGVSAILSVLCYTEFAVELPVAGGSFAYLRVELGD  
FVAYVAAGNILFEYVAVAGAVARSWTSYFATLCNHDPNDFRFYASSLAEGYNRLDPIAVAVSIVVCVLASLSMKG  
SSRFNSIASIVHMMVIAFMLVAGLTKADSANFKDFAPFGLRGILKASSMLFFAYVGFDTTTLGEEIKKPARDIP  
IGLIGMSLSVMIVYCLLAATLVLMQPYAQIDVDAPYSVAFSAVGMDWAKYIVAFGALKGMTTVLLANIIGQARYF  
THIGRTHMAPPFLATINKKTGTPVNATVFM TIANSVIAFFTSLDVLNLLSISTLFI FSLVALALLVRRYVQGRK  
PKIWGAPIVPWLPSASIAINVFILGSMDSFARFAVWTGILLVYVYLFVGLHASDYDAKIVAYRV

>Vv-CAT2 (GSVIVP00003854001)

MGVGGDFDSQKRGRGFKGLMRRKLVDSARKEVDGGHKLAKELSVTHLIAIGVGSTIGAGVYILVGTVAREHSGP  
ALTISFLIAGIAAALS AFCYAE LSSRCP SAGSAYHYSYICVGESVAVLIGWALILEYTVGGSAVARGISP NLALL  
FGGGDLPAFIARQYIPALDIVVDPCAAILVFI VTTGLLCVGIKESTVAQAI VTTGNVCAMMFVVIAGGYLGFKTGW  
AGYELPTGYFFPGVDGMLAGSATVFFAYIGFDSVASTAEVKNPQRDLPLGIGAALSISCI LYMLVSVVIVGLVP  
YYSMDPDTPISTAFASHGMKWAAYIITIGAVTALCSTLMGSLLPQPRILMAMARDGLLPSFFSDLNRRRTQVPVKA  
TIVTGIGAATLAFFMDVSQLAGMVS VGTLLAFTMVACSVLILRYVPPDEVPLTPSHQESIDTVSLQHSSSNQKID  
EENSKVCAGPSNEITRPLIAKEGASADPVVVKNVLDRIYIDENMRRKIAGWTIMLTCVGVVLLTSAASYVNLPS  
FPRYMFCGIGGALLLSGLIVLTCIDQDDARHNFHSGGFICPFVPLLPACILINVYLLVNLGSATWTRVSIWLG  
IGVLVYGFYGRHSSLQNAVYVPAADVDEIYGSSSDCLA

>Vv-CAT4 (GSVIVP00003852001)

MGALVNMQKGGGDGCRRAF SRGLTSLIRKPVDSVHTRSETRGLARRLSLVDLIAIGVGSTIGAGVYILVGTVAR  
ENTGPALTI SFLVAGIAAALS AFCYAE LACRCPSAGSAYHYSYICVGEI AWLIGWALILEYTI GGS AVARGISP  
NLALFFGGEDKLP AFLVRYTISWLGIVVDPCAAILVFI VTTGLLCVGIKESTLAQTIVTVVNVCMVFI I IAGGYL  
GFKTGWVGYELQGGYFFPGANGMLSGSAIVFFSYIGFDSVSTAEVKNPQKDLPLGIGLALAI CCILYMLVSVV  
IVGLVPFYELNADTPISSAFSSYGMKWAAYT VTTGAVTALVATLMGSILPQPRILMAMARDGLLPSFFSDINKHT  
HVPVKSTILTGI FAATLAFFMDVSQLAGMVS VGTLLAFTTVAISVLI LRYVPPPEEVPLVSSSQEPLDSVTSQFHH  
DTQDIGTETSKNLLGSCEDDRQPLLGEESLIGYPLNKKELAQDVQNEQKRRKIAAWSITLLCIGVLVLTSAASA  
EKFWSI PRFMLCGVGIALLLCLGLTVLTCIEQDDARHSFGHTGGFVCPFPVFLPAACILINTYLLINLGAGTWIRV  
SVWL VVGALIYVYGRTHSSLVDADAAHEPRTQAEI SATSSEDVA

>Vv-CAT5 (GSVIVP00030103001)

MGSMGEVGD EIQPRGYWRWSKQDFLPEESFKNWASYSALSQTCFRFKDRLTSRSEDAIEIGEMRKQSENDMKRC  
LTWWDLTWFGFGSVIGAGIFVLTGQEAHDHAGPAIVLSYVASGVSALLSVFCYTEFAVEIPVAGGSFAYLR IELG  
DFAAFITAGNILLESIVGSAGVARAWTSYFTLLNRPTNSLR IHTNLTKGYNLLDPIAVAVLAI AATLAMISTRK  
TSVFNWIASAINTVVILFVI IAGFANADPSNLTPFLPYGAKGIFQAAAIVYFAYGGFDNIATMAEETKNPSRDIP  
LGLLGSMSIITVIYCLMALALSMMQDYRDIDRQAAYSLAFQSVGMKWAKYLVALGALKGMTTVLLVVALGQARYV  
THIARAHMIPPWFALVHPKTGTPINATLLIVISSALIAFFS LVDLASLLSVSTLFFVMMMAVALLVRRYVVTGV  
TPRINLLKLVIFLLIIVASSMGTSAYWGLNPNGWVGYAITIPLWVLGTAGISVFLPQQRTPKVWGVPLVPWLPSL  
SIATNLFLMGSLESKAFIRFGVCTVLMVYVYFFFLHATYDVAHQQKPESLKFNDGDMGKTGP

>Vv-CAT6 (GSVIVP00010722001)

MAEEISNPSKSLPVGIMGSVFIVSGLYCLMSFALCMMLPYNQIPEKASFAIAFQRMGWKASNIVGAGASLGIVA  
SLLVAMLGQARYLCVIGRARLVPLWLAKVHPSTGTPLNATLFLGAF TASIALFTELEIVVDMVNLC TLLVFLVA  
NALIYRRYVITVNNPPFHTLLFLSLLSCSSIAFSLSWKLLQWGLPLFGGIMI IITACFHYFAPYPNQPSKWSVP  
FMPWPAAMSIFLNVFLMTTLKLLSLQRFGVWSCLIIILFYVLYGVHSTYRAEEMGMDAGGVNPNSSAQQTCLDIQL  
L

>Vv-CAT7 (GSVIVP00013821001)

MDTHGSSSFSSFTAYARALAQTPSRLARRACSVSTSFEEMSRVRARSGSDMQRNLRWFDLVGFGLGGMVAGVVFV  
TTGRASRLYAGPAVVLVSYAIAGICALLSAFICYTEFAVDMPVAGGAFSYLRVTFGEFAAFLTGANLVM DYVLSNAA  
VARSFAYLGTAI GFPTTKWRFTVSGLPKGFNEIDLVA VAVVLIITLIICYSTRESSVVMVLTAMHILFIAFVI  
VVGFWRGDWKNFTEPADPRRHQGGFFPFGASGVFNGAAMVYLSYIGYDAVSTLAEVVRNPVKDIPIGVSGSVMLV  
TILYCLMAASMSKLLPYDAIDPEAPFSAAFRQSNQNGWKVSNVIGAGASFGILTSMLVAMLGQARYMVCVIGRSKV  
VPSWFARVHHKTCTPVNASAFGLIFTAAIAVFTDLNVLNLSVIGTLFVFMVANAVIYRRYVSVGATNPWP TLS  
FLVSFSLTSII FTLIWHFAAPGHPKEVMLGACTVVAVAILQMFHCMVPQVRKPEHWGVPLMPWIPSI SIFLNIFL  
LGS LDRPSYVRFYFSALAVLVVLYSVHASFDAQEDGYI IQKNAEIPKDSEASVDAITMV

>Vv-CAT8.1 (GSVIVP00030275001)

MSIRTHILTRYLTHFLPNFFPEESFQNLASYKTALSHTCFRLKDRLLNRSSVANEMLLFQSEENAMKKCLTWWDL  
VWMSFGSVVSGIFVITGQETRYDAGPAIILSYAVSGFSALLSVLCYTEFAVEIPVAGGSFSYLRVELGDFVAFI  
AAGNILLEAIVGAAGLARSWSSYFASMINTD TDFLRIRVSYFADGFNLLDPIAAVVLLIADGIAMSGTRRTSILN  
WISSVLSFMVILFII VIGFIRGKTSNLVPPFPYGARGVFRAAAVVYWSYTGFDMVATMAEETKNPTRDIP LGLVG  
SMSMITVVYCLMALVLSMMQKYNEVDANAAYSVVFEEKIGMTWAKYLVSICALKGMTTSM LIGGLGQARYMTQIAR  
AHMIPPWFALVHPRTGTPINATLLMAIPGATIALFSSLDVLS SIFSFSTLLIFMLVAVALLVRRYVVKDTTAKRD  
LVKFLACLIVII GSSIGIAVLWNSNTTEWVGAVGAFWLWFLGTLGMGLLPKQRVTNVWGVPLVPWLP SLSIGMNL  
FLIGSLGYQAF LRFFICSAVMLIYYFLVGLHATYDMARQNQQA

>Vv-CAT8.2 (GSVIVP00009349001)

MASLPGKFAVEIPVAGGSFSYLRVELGDFVAFLVAGNILLEAIVGAAGLARSWSSYFASMINTNADFLRIRVSHL  
ANGFNLLDPIAAGVLLIADGIAMCGTRGTSILNWISSVISFMVILFII IIRFIRGKTSNLVPPFPYGARGVFRAA  
AVVYWSYTGFDMVATMAEETKNPTRDIP LGSVGSMTMITVVYCLMALVLSMMEKNNELDVNAA YAVVFERLGMKR  
AKYLVSICALKGMTTSL LIGGLGQARYMTQIARAHMIPPWFALVHPRTGTPINATLLVAI PSATIALFSSLDVLS  
SIFSFCTLLIFSLIVVALLVRRYVVKDTTVKRD LVKFLACL FVII GSSIGIAVLWNPNTGWIGYAVAAFIWFLR  
TLGMALLPKQRVANVWGVPLVPWLP SLSVAMNLFVGLSLGYQAF LR FVICSAVMLIYYLF IGLHATYDVAQSQEY  
VY

>Vv-CAT9 (GSVIVP00019109001)

MSPRGNSNMLPVYKRRRTENIQAGSVMGEGKPTAYLPSSSSSSSYISRFCSSALRKTTLASSPSDSSIRTLSGD  
ALVRRRLGLFDLILIGVGASIGAGIFVVTGT VARDAGPGVTISFILAGASCVLNALCYAELASRFP AVVGGAYLYT  
YTAFNELTAFLVFAQLMLDYHIGAASIARSLASYVVAVLELFPFFKENIPSWIGHGGEEFLGGALSINILAPILL  
VLLTII LCRGVGESSAVNCFMTVTKVIVLVFV IIVGAFKVDVSNWSPFAPNGFEAILTGATVVFFAYVGFDAVAN  
SAEESKR PQRDLP IAIMGSLLVCVVLYIGVCLVITGMVPYKLLGEDAPLAEAF TSKGLKYVSILISIGAVAGLTT  
TLLVGLYVQSRLYLGLGRDGLLP S L FARVHPKAHTPVHSQI WVGIVASILAGLFNIHALSHILSVGSLTGYSVVA  
ACVVTLRWNDKTASQVSTRWTSTWQEGVIYLI I IAGCGFSAGLFYRVGASFFCLLVA AVI AVLASIALYSRQVYM  
NPPGFSCPGVPIVAVCIFFNIFLFAQLHYEAWRVFVILSLISIGIYAFYGYHADPLSSNETI IYHRAPIEEGQ
